# Supplementary material for: Attitudes and Beliefs towards Rotavirus Vaccination in a Sample of Italian Women: A Cross-Sectional Study
Source: MDPI journal article supplement (doi:10.3390/vaccines11061041), 2023-05-30
Supplement: s1 [file s1]

**Table S1. Reasons to refuse the rotavirus vaccination**

|                                                                   |           |
|-------------------------------------------------------------------|-----------|
| <b>N=221</b>                                                      |           |
| <b>Did you get rotavirus vaccination for your previous child?</b> | 115(52.0) |
| <b>Why not?</b>                                                   |           |
| Useless                                                           | 47(44.3)  |
| Fear of adverse event                                             | 44(41.5)  |
| Over the allowed time                                             | 8(7.5)    |
| other                                                             | 7(6.6)    |
| <b>Did you performed DTP vaccination during pregnancy?</b>        | 117(52.9) |
